# Supplementary material
Source: Springer Nature journal article supplement (https://www.springermedizin.de/resource/supplementary/12245_2011_111_MOESM5_ESM.pdf/9672796)

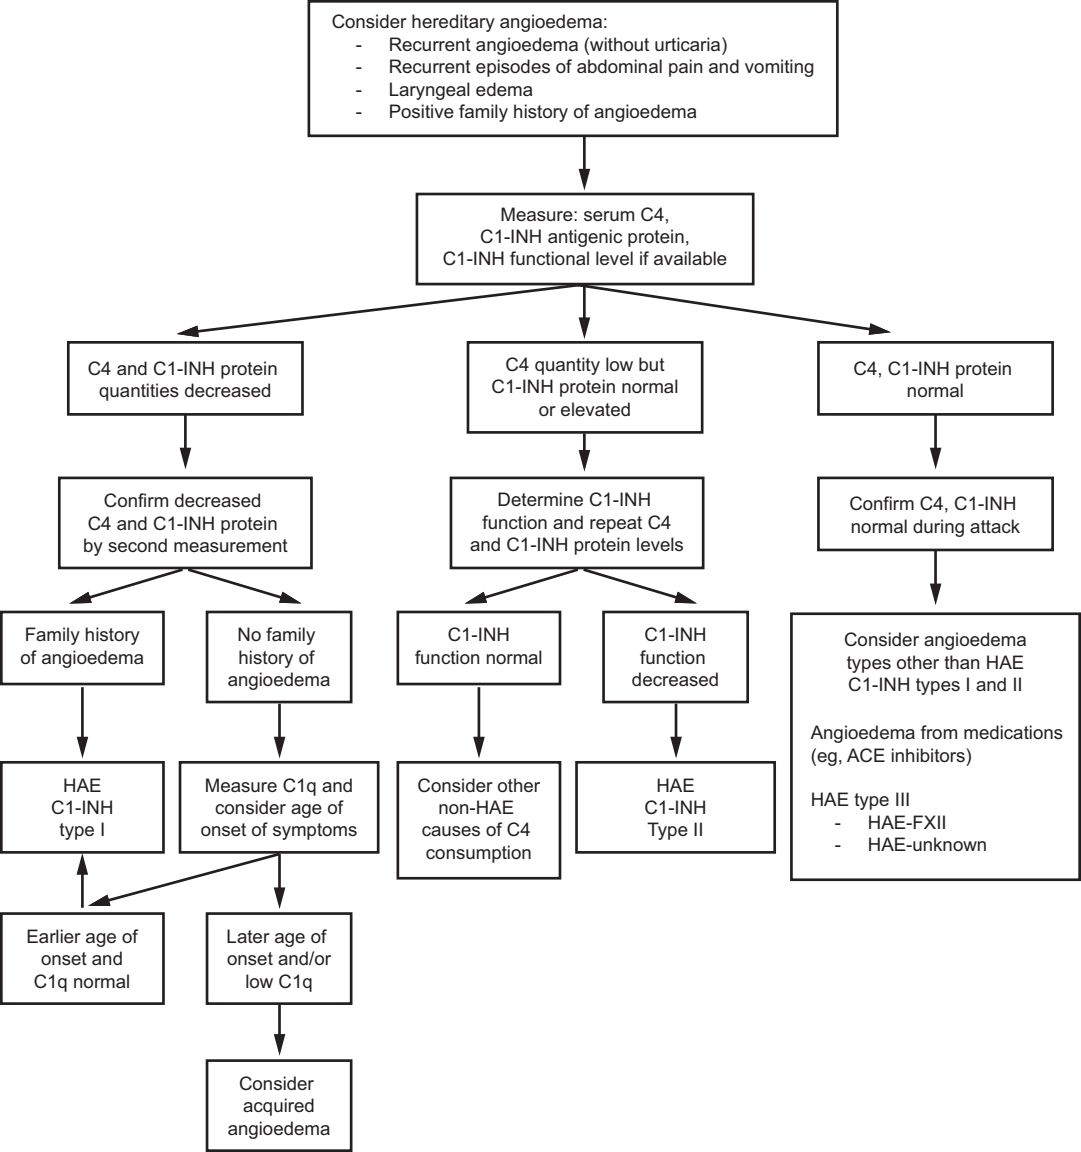

Supplement: MOESM5 [file 9672796]
